# Supplementary material for: Highly conductive and transparent copper nanowire electrodes on surface coated flexible and heat-sensitive substrates
Source: Royal Society of Chemistry journal article supplement (doi:10.1039/c7ra12738c), 2018-01-01
Supplement: c7ra12738c1.pdf [file c7ra12738c1.pdf]

**Supplementary Information**

**Highly conductive and transparent copper nanowire electrodes on  
surface coated flexible and heat-sensitive substrates**

Su Ding<sup>a,b</sup>, Yanhong Tian<sup>a,\*</sup>, Jinting Jiu<sup>c,\*</sup>, Katsuaki Suganuma<sup>c</sup>

<sup>a</sup>State Key Laboratory of Advanced Welding and Joining, Harbin Institute of Technology, Harbin, 150001, China

<sup>b</sup>College of Materials and Environmental Engineering, Hangzhou Dianzi University, Hangzhou, 310036, China

<sup>c</sup>The Institute of Scientific and Industrial Research (ISIR), Osaka University, Osaka 5650871, Japan

Corresponding authors: [tianyh@hit.edu.cn](mailto:tianyh@hit.edu.cn), [jiu@eco.sanken.osaka-u.ac.jp](mailto:jiu@eco.sanken.osaka-u.ac.jp)

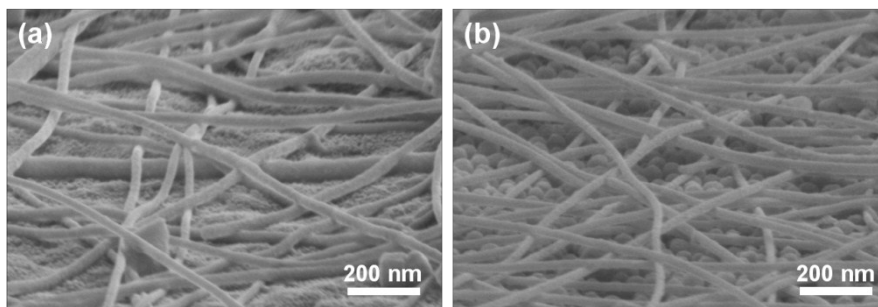

Fig. S1 Tilted SEM images of CuNW networks on N-PET and C-PET, respectively

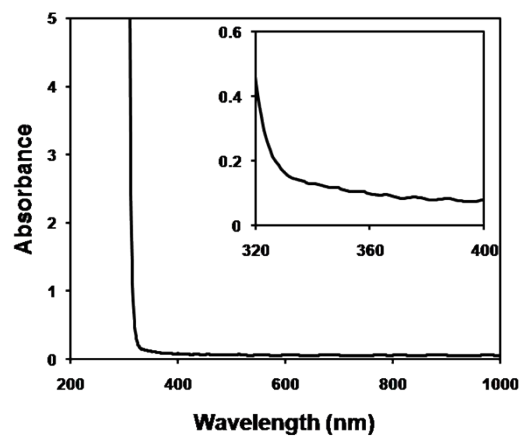

Fig. S2 Adsorption spectrum of N-PET polymer.

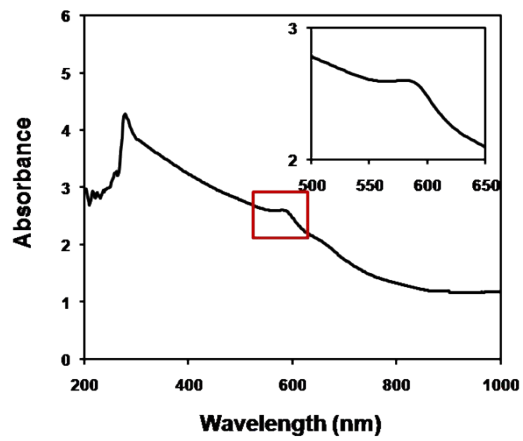

Fig. S3 Adsorption spectrum of CuNWs.

Tab. S1 Parameters of Cu and N-PET used in the simulation

| Material name | Thermal conductivity (W/mK) | Mass density (g/cm <sup>3</sup> ) | Specific heat (J/kg) | Melt temperature (Degree) | Absorptivity (%) |
|---------------|-----------------------------|-----------------------------------|----------------------|---------------------------|------------------|
| Cu            | 401                         | 8.96                              | 382.5                | 1084.6                    | 20               |
| N-PET         | 0.24                        | 1.4                               | 730                  | 370                       | -                |

Tab. S2 Parameters of the photonic sintering machine

| Voltage (V) | Pulse duration (μs) | Pulse number | Pulse frequency (Hz) |
|-------------|---------------------|--------------|----------------------|
| 750         | 30                  | 10           | 1                    |

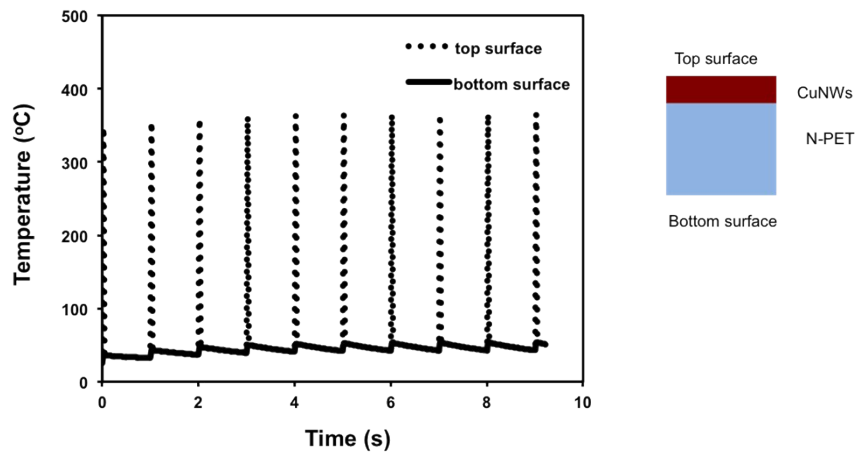

Fig. S4 Simulation result of the temperature evolution at the surface and the bottom of the CuNW transparent electrodes on N-PET substrate.

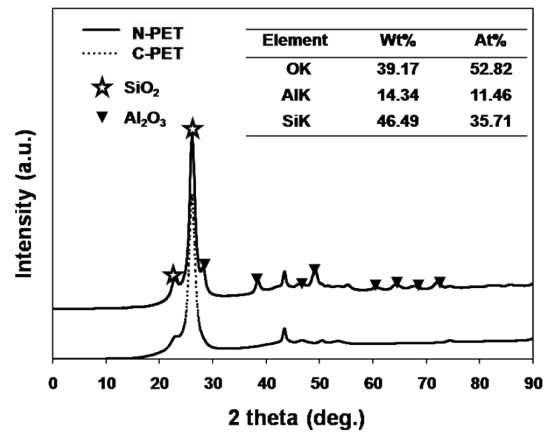

Fig. S5 XRD curves of N-PET and C-PET polymer. Inset is the quantity analysis result using energy dispersive spectrometer (EDS) result of C-PET.

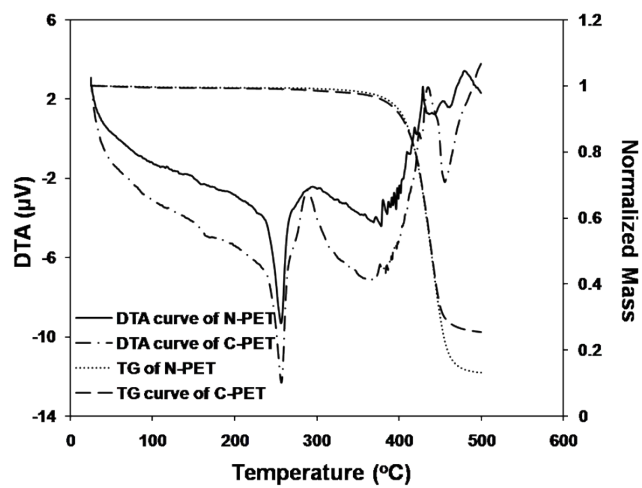

Fig. S6 DTA/TG curves of N-PET and C-PET polymer.

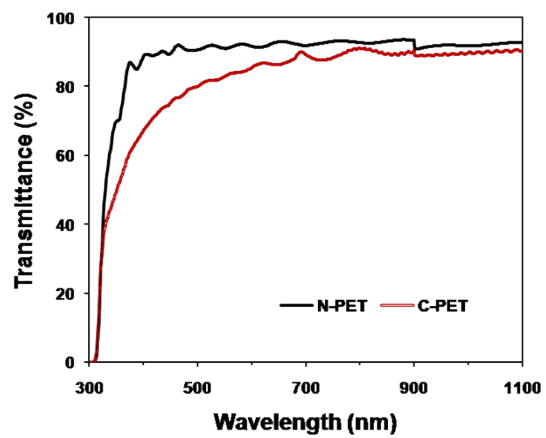

Fig. S7 Comparison of transmittance curves for bare N-PET and C-PET.
